# Supplementary material for: Investigating the impact of exit effects on solute transport in macropored porous media
Source: Copernicus journal article supplement (doi:10.5194/hess-2020-494), 2020-10-06
Supplement: Supplementary file [file hess-2020-494-AC1-supplement.pdf]

**We thank the reviewer for his/her comments and his/her questions. Detailed answers (in bold) are given below. All the corrections made to the manuscript appear (in blue colour) after our response.**

#### General Comments

The study aims to demonstrate an exit effect (outer filter) in solute transport in a soil column with artificial macropores. They utilize advanced methodologies such as breakthrough experiments, MRI, and Comsol Multiphysics software. The results showed that an exit effect occurs with a good agreement between the three independent methodologies. I agree with your findings and congratulate the researchers for the hard work. Indeed, the study shows an exit effect on solute transport. Therefore, the overall research question is answered.

**We thank the reviewer for his positive appreciation of our work.**

Before publication, I suggest an in-depth English edition. I found some technical corrections (see below); however, I am sure that I drop some more. Finally, I would like the authors to answer the next general and specific comments.

**We made the technical corrections suggested by the reviewer. We will reread very carefully the manuscript to correct residual language errors.**

Q1. You did a nice introduction to the problem. You highlight that column laboratory experiments are commonly used to study the transport of various contaminants in soils or fit experimental data with a transport model. Considering the second highlight (fit experimental data), we commonly fit the dispersion length for a non-reactive solute with BTCs without considering exit effects and then use it for model simulations. Given your results for columns B and C. Do you think that the magnitude of the fitted dispersion length using the blue or red curves in Figure 3, might be strongly different? I mean, we should be worried about the current estimation of dispersion length without considering exit effect under laboratory conditions? I think the discussion about this is important in your manuscript because you also mentioned this in the conclusions. You indeed found an exit effect with your study, but it can be irrelevant for the fitted parameter (e.g., dispersion length). Finally, it could be interesting to see the exit effect for an adsorbing solute with COMSOL to expand this study (optional).

**Indeed, we think that dispersivity (= dispersion length, if we understand correctly the terminology used by the reviewer) values inferred from BTCs should be taken with a grain of salt and can be impacted by entrance/exit effects. This statement may seem conservative, but even for homogeneous porous media, doubts have been raised about the pertinence of dispersivity values fitted from BTCs. For instance, you can have a look at Fig. 9 of [DOI: 10.1103/PhysRevE.94.053107]: in this article, the significant discrepancy between the “global” dispersivity fitted from the BTCs and the “local” one measured by NMR is explained by the existence of entrance/exit effects. As shown in our manuscript, with the macroporous systems we investigated, an exit effect is clearly visible, both on water flow and solute transport, which was not the case for homogeneous porous media. This effect induces a non-unidirectional water flow near the outlet filter and necessarily impacts the quality of estimates of hydrodynamic parameters (including dispersivity) when a one-dimensional transport model is employed. Consequently, compared to homogeneous porous media, we expect even more bias for the estimates of dispersivity with heterogeneous columns. More specifically, for**

**the blue and red curves of Fig. 3, we found a twofold difference in the dispersivity values between the two scenarios (with and without the filter).**

**Finally, we agree that performing these kinds of experiments or computer simulations with a reactive solute would be very interesting. However, this topic is out of the scope of this work, but it could be the subject of further studies.**

Q2. You demonstrate an exit effect using a soil system with a high macropore diameter (3 mm) in a sandy matrix with a mean pore diameter of 0.58 mm (for some researches, that diameter is indeed a macropore itself). The 3 mm macropore connects perfectly to the top and bottom boundary of the column with the filter. Therefore, your system allows fast water flow and solute transport in both domains, which can be different from the standard description of macropore flow where the soil matrix has very low permeability, and macropores can terminate at different depths. Thus, I think your system is convenient for observing the exit effect because of the high differences in permeability between the filter and the bulk soil system. What happens with the exit effect if the macropore terminates in the soil matrix before reach the bottom filter? What happens with smaller macropore diameters where the flow velocity is lower than for 3 mm macropores?. These questions are important for analyzing your conclusions. Please check your conclusion from line 371 onwards; they cannot be general because your study is particular, perhaps, unrealistic.

**The reviewer questions the chosen experimental conditions. Indeed, many contrasted conditions and scenarios could be tested. We promoted experimental conditions (column length, choice of the matrix, macropore diameter) allowing fast water flow through the macropore and thus reasonable experiment durations while providing convincing results.**

**The genericity of our results can be questioned at two levels: (i) relative characteristics of the macropore and the matrix and (ii) relative characteristics of the macropore and the matrix with regard to the filter.**

- i) Regarding the first point, the importance of the flow in the surrounding porous matrix is related to the permeability and the surface area ratios between both domains. Our system could be used with a less permeable matrix or a macropore having a larger diameter to deal with situations where the velocity contrast between the macropore and the porous matrix is more pronounced. However, studying such systems could be very time-consuming (the smaller the pore velocity in the matrix, the longer for the solute to exit the column). If the macropore terminates in the porous matrix before reaching the outlet filter, the BTC will be different [DOI: 10.1016/S0169-7722(99)00079-0]. If the length of the macropore is almost equal to the length of the porous system, the discrepancy will remain moderate. It will increase if the relative length of the macropore decreases. If a macropore with a smaller diameter is used, the two peaks will probably be closer to each other, since the pore velocities in the matrix and the macropore will be closer. They will eventually merge if the diameter of the macropore is small enough (when the diameter of the macropore tends to 0, we end up with a homogeneous system and the BTC displays a single peak in this case).**
- ii) Regarding the relative characteristics of the macropore and the matrix with regard to the filter, we also expect an impact. The impact of a porous layer inserted in a porous matrix is related to its hydraulic conductivity and that of the surrounding porous medium [DOI: 10.1021/es035029s]. In our case, the observed strong impact of the filter was also likely due to the gap in hydraulic conductivity between the filter and the surrounding matrix and macropore. Consequently, as**

**stated by the reviewer, we expect less influence for finer matrices and smaller macropores. However, that hypothesis requires more investigation.**

**We would like to stress that there is no canonical way of studying experimentally heterogeneous porous media. Choices have to be made. Our work is certainly not the definitive answer to this kind of studies. Our goal was simply to raise awareness on the possibly strong impact of exit effects on BTCs and to explain their origin.**

**Finally, we believe that the range of validity of our conclusions exceeds the case of the particular systems used in this work. The key point is the non-unidirectional nature of the flow field that makes it difficult to reliably infer transport properties: this is a general feature of heterogeneous porous media and it will unavoidably affect parameter inference to some extent if a 1D macroscopic transport model using lumped parameters is used. However, we agree that we did not prove this point in full generality and we rephrased our conclusion accordingly.**

Q3 Finally, in your conclusion (Ln 371), you mentioned that “Our results shows that this knowledge is crucial for the understanding of the outcome of transport experiments in heterogeneous columns and for the accurate inference of transport properties from breakthrough studies.” As I mentioned in Q1, I think you did not demonstrate the last point. We do not know if the exit effect is critical for the accurate inference of transport properties from breakthrough studies with your study. From your study, we can know that the exit effect happens in your particular setup (which is probably deviated for common heterogeneous soils with macropores).

**This question is somehow related to Q1 and Q2. We agree that the quantitative importance of the exit effects on dispersivity inference is not detailed in the manuscript. However, we explicitly showed that the exit affects solute transfer and BTCs at the outlet. The analysis with any 1D macroscopic model (even when using a dual permeability approach) will fail in providing the nominal value of dispersivity of both the matrix and the macropore.**

**In addition to that, our line of thought is as follows: given an experimental BTC and a macroscopic transport model, one can infer a dispersion coefficient related to matrix transport; this coefficient is not intrinsic to the matrix since it depends on the pore velocity (see Eq. 5); consequently, the most relevant quantity is the dispersivity (= dispersion / pore velocity, if molecular diffusion can be neglected). However, our computer simulations show that the pore velocity within the matrix cannot be described by a single numerical value, as for homogeneous porous media (see Fig. 6b). Therefore, the most reasonable choice is to divide the inferred dispersion coefficient by the “bulk” pore velocity, i.e., the ratio between the length of the column and the time associated to the maximum of the second peak. However, our work shows that this time is affected by the presence/absence of an outlet filter. This is not a favourable situation for doing accurate inferences. For instance, as stated in our response to Q1, there is a twofold difference in the dispersivity values corresponding to the red (without any outlet filter) and blue curves (with an outlet filter) of Fig. 3.**

Specific comments

Abstract: Please mention that your study is only under saturated conditions.

**Done.**

Ln 36 What do you mean by “real soils.”?

**We suppressed “real”.**

Ln 39. Please explain what you mean by this sentence, “the effect of macropores being expected to culminate when they are activated (i.e., water-saturated)” The sentence is tough to understand.

**Macropores only impact water and solute transport when they are filled with water. This is only the case when the porous medium is water-saturated, or at least close to saturation. We rephrased this sentence to make this point clearer.**

Ln 63 Please include the error in the construction of the cylindrical macropores generated by the 3D printer. Commonly for smaller diameters, the error might increase considerably.

**The spatial resolution of the 3D printer is 0.1 mm. We added this information in the manuscript.**

Ln. 45. In the sentence related to the objective, please state that the soil system was under saturated conditions. The breakthrough experiment can be done either in undersaturated or saturated conditions.

**Done.**

Ln 110. You mentioned that MRI is utilized to visualize water flow and  $Gd^{3+}$  transport. However, in this section, you only mentioned that MRI was used to visualize the latter. The transport of  $Gd^{3+}$  can be somewhat different from the water flow due to dispersion or diffusion. Did you visualize water flow or just  $Gd^{3+}$ ?. In the results and discussion, you barely mentioned water flow also. Please check.

**We imaged the presence of  $Gd^{3+}$  with the MRI sequence used in this work. The local  $Gd^{3+}$  concentration is related to water flow, but also to other processes, as noticed by the reviewer. We clarified this point in the text: in the sentence “We used these solutions for visualizing water flow and  $Gd^{3+}$  transport within the column by MRI”, we suppressed “water flow and”. Some MRI sequences have been developed to directly visualize water flow in porous media, but we did not use any of those in this work.**

Ln 141 You mention “Stokes equation”. However, I would like that you mention the specific equation that you are using. I might think that you are simulating Creeping flow or Stokes flow in your macropore for fully saturated conditions. This kind of solution is special for low Reynolds numbers. Finally, I think you drop the gravity term in Eq. 2 (please check) because you simulate in the vertical flow direction.

**The Stokes equations are written in Eq. 2. They are indeed used do model a Stokes flow (also called creeping flow) and are valid for moderate Reynolds numbers. The flow of a Newtonian liquid within a capillary (like a macropore) remains laminar for  $Re \leq 2.1 \times 10^3$  [DOI: 10.1126/science.1203223], which is indeed the case in our experiments.**

**For the gravity term, we thank the reviewer for pointing out this omission in the text. We made the appropriate correction in the manuscript.**

Ln 151 Why are you not considering dispersion in the macropore?

**Dispersion is an emerging (i.e. macroscopic) concept stemming from the combined effect of the water velocity field and molecular diffusion. At small scale, the sole physical processes are advection and diffusion.**

**When one deals with a soil column or even a homogeneous porous medium, the pore-scale velocity field is very complicated and it is not possible nor desirable to disentangle the advective and diffusive components of transport. In this case, the effect of small-scale variability on macroscopic solute transport is described statistically, with a longitudinal dispersion coefficient or a dispersion tensor. But in some situations, for instance when the flow domain is simple enough (e.g. for a capillary), advection and diffusion can be taken explicitly into account to model solute transport (the standard example is tracer transport in laminar flow through a straight tube of circular cross-section, which leads to Taylor-Aris dispersion for long enough tubes).**

**This is what we have done in the macropore: we solved the Stokes and the convection-diffusion equation in this domain and it is the interplay between advection and diffusion that generates some Taylor dispersion.**

Ln 167 How did you compute the new mean pore diameter?

**This is the mean diameter of the grains  $d_g$  (related but not strictly equal to the mean pore diameter). It was estimated by modifying the permeability of the porous matrix to get a good fit of the experimental BTCs and by using the Kozeny-Carman equation to get  $d_g$ .**

Ln 170 Please specify if that porosity was obtained from the factory or you guessed it?

**We estimated it. Its precise value does not have much effect on the numerical results.**

Ln 172 This equation was computed under laminar flow conditions? If so, please mention it.

**Yes. We mentioned it in the revised version of the manuscript.**

Ln 174 why are you using a value different from 0.57 mm for the dispersion length?

**Actually, we used 0.38 mm, which is the median pore diameter measured by X-ray tomography (see Sec. 2.1).**

Ln 176 Do you have a wall boundary condition for the 0.5 diameter openings that connect the macropore with the matrix?.

**No, as it would forbid water and solute exchange between the macropore and the matrix. The lateral boundary of the perforated macropore inserted in column B was not modelled. We considered that the interior of the macropore and the matrix were directly in contact. From a numerical point of view, the Brinkman and Navier-Stokes domains were thus contiguous.**

Technical corrections

Title: I think “macropored” is not correct. Perhaps macroporous.

**We followed the suggestion of the reviewer.**

Ln 2. “Macropored porous media” do not sound okay to me. It could be “filled with macropores.”

**We rephrased that sentence.**

Ln 2-3. I suggest to change “numerically investigated, **and the**” by “numerically investigated. **The**”.

**Done.**

Ln 4. I think you can delete “of the presence of.”

**Done.**

Ln 5. I suggest you modify “macropored systems” by macroporous systems. Please check yourself all the times that you mentioned “macropored.”

**Done. We made the corresponding modifications everywhere in the manuscript.**

Ln. 16. I suggest deleting “Broadly speaking.”

**Done.**

Ln 24. I suggest removing “presence of the”

**Done.**

Ln 30. Check that you used “and” several times. Perhaps you should remove the “and” in “and frits.” Alternatively, rewrite the sentence.

**We suppressed the first “and”.**

Ln 33. Please considered change “may trigger disturbance of water flow” into “may trigger water flow disturbance.”

**Done.**

Ln 36. Please considered to split this sentence into two “Real soils frequently contain macropores (Beven and Germann, 2013), which are large and continuous openings known to be involved in the rapid displacement of water and chemical substances, and various breakthrough experiments have been performed to study the role played by single macropores embedded in porous medium (Allaire et al., 2009)”

**This sentence has been split in two.**

Ln 39. Please check the next sentence because is hard to understand “Unsaturated conditions being difficult to sustain in a well-controlled fashion, and the effect of macropores being expected to

culminate when they are activated (i.e., water-saturated), many results have been obtained from macropored columns operated in the saturated regime, with different artificial systems: packed soils containing constructed macropores, macropored sandy media, glass bead packings crossed by a macropore, etc. (Allaire et al., 2009; Li and Ghodrati, 1997; Ghodrati et al., 1999; Lamy et al., 2009; Batany et al., 2019).” I think you should not use “being” e.g. “Unsaturated conditions **are** challenging to sustain in a well-controlled fashion. Also considered to split and rephrase the sentence is too long.

**We rephrased that part.**

Ln 45. I suggest removing “of the presence.”

**Done.**

Ln 58. I suggest modifying “Finally, the sand was dried at 105 °C during 24 h and” into “Finally, the sand was dried at 105 °C for 24 h and.”

**Done.**

Ln 76 In the next sentence “for some of the experiments”, please remove “of the”.

**Done.**

Ln 114 In the next sentence, “Due to its paramagnetic properties, Gd<sup>3+</sup> is known to be an excellent MRI contrasting” please remove “known to be”.

**Done.**

Ln 125. Please consider removing “as” from the next sentence “as the measured 16 echoes.”

**We rephrased that part.**

Ln 126-129 Please use the next sentence “ Moreover, due to the short recycling delay used to keep measurement time below 4 min, the resulting signal depends simultaneously on the spin-lattice relaxation time T1 and the spin-spin relaxation time T2, thus complicating quantification of a simple comparison with a reference. The MRI images can nevertheless be used to evaluate where Gd<sub>3+</sub> is present within the column.”

**Done.**

Ln 136. Please remove “one” from “another ONE for the macropore.”

**Done.**

Ln 145 Please remove “in” from the next sentence “the surrounding porous medium and in the filters”

**Done.**

Ln 151 I suggest to modify “The transport of the non-reactive solute was modeled” into “ The non-reactive solute transport was modeled”.

**Done.**

Ln 155 Please remove IN as before.

**Done.**

Ln 169 Please use the next sentence (included “a”) “The filter was modeled as a thin porous slab.”

**Done.**

Ln 174 Please correct “longitudinal.”

**Done.**

Ln 179. In the next sentence “of injected solution and to 0 afterward” it should be “afterward” and please remove “to”

**Done.**

Ln 205 I suggest modifying “The decrease of” into “The decrease in”.

**We believe both formulations are correct. We kept the original one.**

Ln 209. In the next sentence, “hollow cylinder used in column B with a plain one to investigate” replace “by” for “with”.

**Done, even if we think that “by” and “with” can be used interchangeably in this case.**

Ln 211 In the next sentence, “the presence (blue curve) and in the absence.” please remove “in”

**Done.**

Ln 214 In the next sentence, “Thus, the solute having entered the column” please replace having entered by entering.

**Done.**

Figure 3: In the next sentence, “the presence (blue curve) and in the absence” please remove “in”

**Done.**

Ln 217 Please consider changing your sentence for this one “This is not the case for column B, whose macropore is perforated; thus, it can experience some solute transfer between the macropore and the surrounding matrix”

**Done.**

Ln 230 Please modify “These images were taken over the course of the injection” into “These images were taken throughout the injection of”

**Done.**



Ln 271 Please consider modifying “which is its influence on the position of the second peak” into “which is its influence on the second peak position”

**Done.**

Ln 273 Please consider to change “On the downside, the modeling of the first peak” into “On the downside, the first peak modeling appears challenging”

**We prefer the initial formulation.**

Ln 274 Please change “we did not succeed...” by “we failed to reproduce this portion of the experimental BTCs quantitatively.”

**Done.**

Ln 244 Please modify the next sentence, “We start the discussion by the case” into “We start the discussion with the case”

**Done.**

Ln 287 I think you should change “Afterwards” by “Afterward”

**Done.**

Ln 293 Please change “on the way” for “how” and “transferred” by “transferred”

**Done.**

Ln 301 Please modify “nearly horizontal until its gets sufficiently” into “nearly horizontal until it gets sufficiently”

**Done.**

Ln 372 Please consider modifying “Indeed, when it comes to fitting the experimental data, a good knowledge” by “Indeed, when it comes to fitting the experimental data, good knowledge”

**Done.**

Ln 331 Please modify “field were obtained at the inlet and at the outlet of the column” by “field were obtained at the inlet and the outlet of the column”

**Done.**

Ln 339 I think you should remove “one”

**We inserted a “that” between the two “one”.**

Ln 343 This sentence is too long, considered split perhaps in “whereas it” by “.In contrast, it”... “However, despite the symmetry of the streamlines between the inlet and the outlet of the column when filters are present at both extremities, qualitatively, solute transport seems to be rather unaffected by the presence of an inlet filter, whereas it is strongly impacted by the presence of the outlet filter: images acquired by MRI (Figs. 4b and 4c) and computer simulations (Figs. 5b and 5c)

show that the solute front is nearly horizontal in the lower half of a macropored column containing a perforated macropore”

**We rephrased this part.**

Ln 347 . Please modify “The presence of the inlet filter probably alter” by “The presence of the inlet filter probably alters”

**Done.**

Ln 380 Please modify “This issue requires a careful consideration of the potential impact” by “This issue requires careful consideration of the potential impact”

**Done.**

# Investigating the impact of exit effects on solute transport in macroporous media

Jérôme Raimbault<sup>1</sup>, Pierre-Emmanuel Peyneau<sup>1</sup>, Denis Courtier-Murias<sup>1</sup>, Thomas Bigot<sup>1</sup>, Jaime Gil Roca<sup>2</sup>, Béatrice Béchet<sup>1</sup>, and Laurent Lassabatère<sup>3</sup>

<sup>1</sup>GERS-LEE, Univ Gustave Eiffel, IFSTTAR, F-44344 Bouguenais, France

<sup>2</sup>Laboratoire Navier, Ecole des Ponts ParisTech, CNRS, Univ Gustave Eiffel, 6-8 avenue Blaise Pascal, 77455 Marne-la-Vallée, France

<sup>3</sup>Univ Lyon, Université Claude Bernard Lyon 1, CNRS, ENTPE, UMR5023 LEHNA, F-69518, Vaulx-en-Velin, France

**Correspondence:** Pierre-Emmanuel Peyneau (pierre-emmanuel.peyneau@univ-eiffel.fr)

**Abstract.** The effect of macropore flow on solute transport has spurred much research over the last forty years. In this study, non-reactive solute transport in water-saturated columns filled with porous media crossed by a macropore was experimentally and numerically investigated. The emphasis was put on the study of exit effects, whose very existence is inherent to the finite size of any experimental column. We specifically investigated the impact of the presence of a filter at the column outlet on water flow and solute transport in macroporous systems. Experiments involving breakthrough measurements and magnetic resonance imaging (MRI) showed that solute transport displayed some significant non-unidirectional features, with a strong mass exchange at the interface between the macropore and the matrix. Fluid dynamics and transport simulations indicated that this was due to the non-unidirectional nature of the flow field close to the outlet filter. The flow near the exit of the column was shown to be strongly impacted by the presence of the outlet filter, which acts as a barrier and redistributes water from the macropore to the matrix. This impact was apparent on the breakthrough curves and the MRI images. It was also confirmed by computer simulations and could, if not properly taken into account, impede the accurate inference of the transport properties of macroporous media from breakthrough experiments.

## 1 Introduction

Column experiments are frequently performed to study the transport of various contaminants in soils (De Matos et al., 2001; Pang et al., 2002; Banzhaf and Hebig, 2016; Jin et al., 2000) or to fit experimental data with a transport model (Nielsen and Biggar, 1961; De Smedt and Wierenga, 1984; Cortis and Berkowitz, 2004). Broadly speaking, the general motivation shared by all these experiments is to study and to understand the transport processes occurring in the bulk of a porous medium in a simple and reproducible setting, by imposing a stationary flow along the axis of the column.

Experimentally, this task is more challenging than it might appear at first sight. The finite size of the column can impact water flow and solute transport with, for instance, the existence of entrance/exit effects affecting the uniformity of the flow near the extremities of a column (Starr and Parlange, 1977; Bromly et al., 2007). Similar issues have been underlined in chromatography (Guiochon, 2006; Farkas et al., 1994; Baur et al., 1988; Farkas et al., 1997; Shalliker et al., 2000; Broyles

et al., 1999; Gritti and Gilar, 2019) and in some fundamental studies of transport in porous media (Lehoux et al., 2016; Deurer et al., 2004; Greiner et al., 1997). The perturbations induced by ~~the presence of~~ the entrance and the exit ends of the column  
25 can have a concrete incidence (e.g., flow disturbance and recirculation in the system reservoirs, additional solute dispersion). Consequently, the breakthrough curves (BTCs) may be affected by entrance/exit effects and may no longer reflect the intrinsic transport properties of the porous medium, but the transport properties of the whole experimental system (Lehoux et al., 2016; Schwartz et al., 1999; Starr and Parlange, 1977; James and Rubin, 1972). Several parts of the column device can impact the solute breakthrough (Giddings, 2002): upstream and downstream reservoirs, restrictions between the reservoirs and the tubes,  
30 ~~and~~ frits or filters positioned at the inlet and outlet. These inert physical filtration devices are often employed to diffuse the incoming water flow evenly on the entrance face of the porous medium and to prevent porous medium particles from exiting and clogging the tubes downstream.

All these parts, located right before and/or right after the porous medium, may trigger ~~water flow and solute transport disturbances~~, especially when the porous medium under scrutiny is heterogeneous (Barry, 2009). Heterogeneous columns have  
35 in particular been employed in transport studies motivated by questions raised by the complexity of water infiltration and mass transport in ~~real~~ soils. ~~Real-soils~~ Soils frequently contain macropores (Beven and Germann, 2013), which are large and continuous openings known to be involved in the rapid displacement of water and chemical substances. ~~Various~~ breakthrough experiments have been performed to study the role played by single macropores embedded in a porous medium (Allaire et al., 2009). ~~Unsaturated~~ However, ~~unsaturated~~ conditions are difficult to sustain in a well-controlled fashion and the effect of  
40 macropores ~~on transport~~ culminates when they are ~~water-saturated~~. Thus, many results have been obtained from ~~macroporous~~ columns operated in the saturated regime, with different artificial systems: packed soils containing constructed macropores, ~~macroporous~~ sandy media, glass bead packings crossed by a macropore, etc. (Allaire et al., 2009; Li and Ghodrati, 1997; Ghodrati et al., 1999; Lamy et al., 2009; Batany et al., 2019). However, to our knowledge, the potential impact of entrance/exit effects on solute transfer through ~~macroporous~~ media has never been investigated so far.

45 This paper aims to demonstrate the significant influence ~~of the presence~~ of an outlet filter on water flow and non-reactive solute transport within an artificial ~~macroporous~~ system (the inlet filter was always set in place to prevent any clogging of the macropore). Using a combination of breakthrough experiments, MRI monitoring and computer simulations, we show that water flow and non-reactive solute transport in ~~water-saturated macroporous~~ media are strongly affected by the presence of a filter at the end of the column. This filter influences the velocity field in a sizable fraction of the ~~macroporous~~ medium and  
50 strongly impacts the transport of solute in the ~~system~~ and its elution at the outlet.

## 2 Materials and methods

### 2.1 Porous media and columns

We have constructed experimental columns filled with Hostun sand (HN 0.6/1.6, Sibelco, France). Before any experiment, the sand was sieved at 0.5 mm with a stainless mesh sieve. The sand was first washed with a  $2 \text{ mol L}^{-1}$  nitric acid solution, obtained  
55 by diluting nitric acid 65% (Emsure, Millipore) in ultrapure water (Milli-Q Integral 3 Water Purification System, Millipore).

The sand was then rinsed twice with ultrapure water and neutralized with a  $0.1 \text{ mol L}^{-1}$  potassium hydroxide solution obtained by diluting  $1 \text{ mol L}^{-1}$  potassium hydroxide (Titripur, Millipore) in ultrapure water. Afterwards, the sand was rinsed several times with ultrapure water until the pH of the solution reached the pH of the rinsing solution. Finally, the sand was dried at  $105^\circ\text{C}$  for 24 h and then stored in a plastic container. The particle size distribution of the sand was measured by laser diffraction (Mastersizer 3000, Malvern). It ranged between 0.30 mm and 1.10 mm, with a median particle diameter equal to 1.0 mm. Pore size distribution was also characterized by X-ray tomography (SkyScan 1275 micro-CT, Bruker) and the median pore diameter was found to be equal to  $d_{50} = 0.38 \text{ mm}$ .

Two kinds of hollow cylinders were used as macropores. They were 3D printed (Form 1+, Formlabs) using a photoreactive resin (Clear Resin, Formlabs), with a 0.1 mm spatial resolution. The hollow cylinders had an inner diameter  $id_m = 3.0 \text{ mm}$ , an outer diameter  $od_m = 5.0 \text{ mm}$ , and a height of 15.0 cm. The first hollow cylinder was plain (no holes), whereas the second one was perforated with 0.5 mm diameter holes resulting in a 25% surface porosity. These two hollow cylinders were used to model impermeable and permeable macropores, respectively: water could flow and solute could cross the boundaries of the perforated hollow cylinder, whereas the plain one was impermeable to water flow and solute transfer.

We used XK 50/30 (Cytiva) columns to pack the porous media. The inner diameter of each column was equal to  $d_{col} = 5.0 \text{ cm}$  and their height was equal to  $L = 15.0 \text{ cm}$ . The macroporous columns were set up by inserting the hollow cylinders along the axis of the columns. Then, the Hostun sand was slowly poured around and dry packed thanks to gentle manual vibrations. Once filled with sand, each column was saturated during 2 h with carbon dioxide, a gas much more soluble in water than air. The column was then slowly water-saturated with a conditioning solution. Then, it was rinsed with 12 pore volumes of the same conditioning solution at different flow rates (from  $0.5$  to  $3.0 \text{ mL min}^{-1}$ ) to stabilize the pH and the electrical conductivity.

Mesh filters (Net Rings, Cytiva) adapted to the XK 50/30 columns with  $10 \text{ }\mu\text{m}$  pores were positioned just before and right after the porous medium. The exit effect, which is the focus of this study, was studied by removing the outlet filter for some of the experiments.

Three experimental columns (denoted A, B and C) were prepared according to the aforementioned methodology: column A is a homogeneous control column, without any macropore, column B contains a perforated hollow cylinder along its axis acting as a permeable macropore and column C contains a plain hollow cylinder along its axis acting as an impermeable macropore. The columns are depicted in Fig. 1. The pore volume of each column was estimated by weighting the column before and after saturation. The values were 119.5, 116.6 and 120.2 mL for columns A, B and C, respectively.

## 2.2 Aqueous solutions

We used two conditioning solutions and two tracer solutions. A  $1.0 \times 10^{-4} \text{ mol L}^{-1}$  potassium nitrate ( $\text{KNO}_3$ ) solution was used as the first conditioning solution. The first tracer solution was a  $1.0 \times 10^{-2} \text{ mol L}^{-1}$  potassium nitrate solution. Both solutions were prepared by dissolving solid potassium nitrate (Emsure, Millipore) in ultrapure water. The conditioning and tracer solutions had an electrical conductivity of  $\sigma_0 = 0.01 \text{ mS cm}^{-1}$  and  $\sigma_1 = 1.19 \text{ mS cm}^{-1}$ , respectively. These solutions were used for the determination of the BTCs.

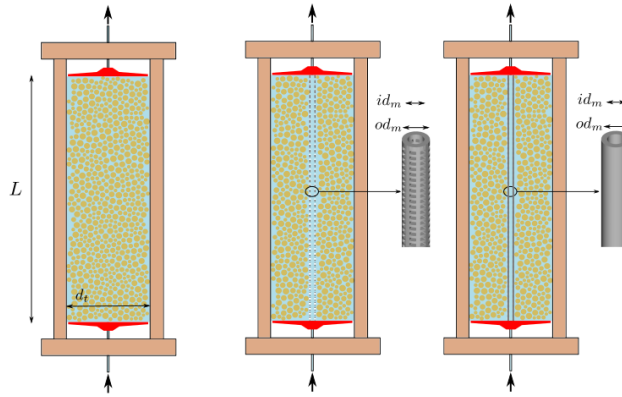

**Figure 1.** Columns used for the injection of solutes: homogeneous control column A (left), macroporous columns with the perforated hollow cylinder B (center) and the plain hollow cylinder C (right). The liquid distribution and collection systems are drawn in red.

The second conditioning and tracer solutions were prepared by dissolving gadolinium(III) chloride hexahydrate (Sigma-  
 90 Aldrich) in ultrapure water. The second conditioning solution was a  $1.0 \times 10^{-4} \text{ mol L}^{-1}$   $\text{GdCl}_3$  solution (electrical conductivity  $\sigma_0 = 0.03 \text{ mS cm}^{-1}$ ) and the second tracer solution was a  $1.0 \times 10^{-2} \text{ mol L}^{-1}$   $\text{GdCl}_3$  solution ( $\sigma_1 = 2.86 \text{ mS cm}^{-1}$ ). We used these solutions for visualizing water flow and  $\text{Gd}^{3+}$  transport within the column by MRI (see Sec. 2.4). Complementary BTCs were also measured with this second set of solutions.

All the solutes were considered to behave as tracers, i.e. non-reactive chemical species following the water flow without any  
 95 sorption, neither to the particles of the porous media nor to the walls of the hollow cylinder.

### 2.3 Breakthrough experiments

Columns were arranged vertically and solutions were injected from the bottom to the top, using a peristaltic pump (Ismatec  
 ISM834A) connected to the injection system of a ÄKTAprime device (Cytiva) with polyether ether ketone (PEEK) tubings hav-  
 ing a 0.75 mm inner diameter (Cytiva) and capillary tubings with an inner diameter of 1.55 mm included in the adapters of the  
 100 XK 50/30 column. This low-pressure liquid chromatography system was used to continuously monitor electrical conductivity,  
 pH, UV absorbance and temperature at the outlet of the column.

Each breakthrough experiment began with the injection of more than 2 pore volumes of conditioning solution to stabilize  
 the pH and the electrical conductivity measured at the outlet of the column. Then, 5 mL of tracer solution were injected. The  
 flow rate was set to  $Q = 3 \text{ mL min}^{-1}$ , corresponding to a mean Darcy velocity  $q = 4Q/(\pi d_{\text{col}}^2)$  equal to  $0.15 \text{ cm min}^{-1}$ . Each  
 105 breakthrough experiment was triplicated. The relative concentration was determined from the measurement of the electrical  
 conductivity  $\sigma$  at the outlet as follows,

$$C = \frac{\sigma - \sigma_{\min}}{\sigma_1 - \sigma_{\min}}, \quad (1)$$

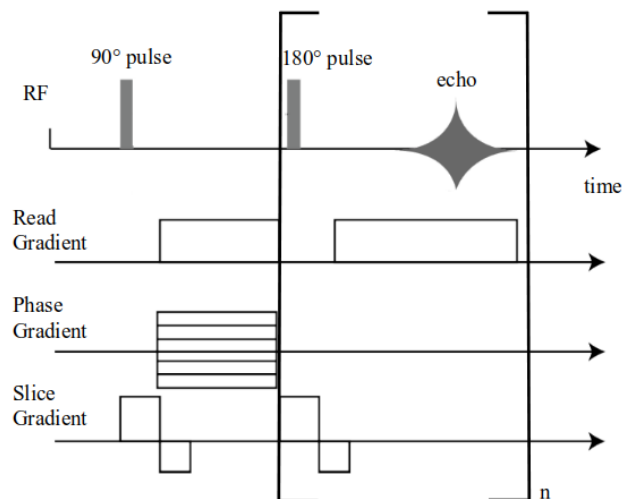

**Figure 2.** MRI sequence employed for image acquisition.

where  $\sigma_{\min}$  stands for the minimum electrical conductivity obtained when the conditioning solution is injected and  $\sigma_1$  is the electrical conductivity of the tracer solution.

## 110 2.4 Magnetic resonance imaging

The transport of  $\text{Gd}^{3+}$  within a column, which is an opaque three-dimensional system, was monitored with a vertical nuclear magnetic resonance spectrometer (DBX 24/80 Bruker), operating with a 0.5 T static magnetic field (20 MHz  $^1\text{H}$  frequency), and equipped with a birdcage radio-frequency coil delimiting a measurement zone of 20 cm in diameter and 20 cm in height. Due to its paramagnetic properties,  $\text{Gd}^{3+}$  is [known to be](#) an excellent MRI contrasting agent (Pyykkö, 2015), and has already  
 115 been used to study solute transport in soils (Haber-Pohlmeier et al., 2017).

As for the breakthrough experiments, the  $\text{Gd}^{3+}$  solution was injected at  $3.0\text{ mL min}^{-1}$  in the column from the bottom with a peristaltic pump connected to the ÄKTAprime device. The sole difference between the classical and the MRI monitored breakthrough experiments was that in the latter case, the connecting tubes were longer (10 m before the entrance and 10 m after the exit of the column), so that the injection system was outside the MRI setup.

120 Two-dimensional MRI vertical slices of 6 mm thickness, encompassing the axis of the column, were taken at different times during the injection of the solute. Each image had  $128 \times 64$  pixels and was acquired in 3 min 55 s. The field of view was  $19\text{ cm} \times 5.5\text{ cm}$ , providing a spatial resolution of  $1.48\text{ mm/pixel} \times 0.85\text{ mm/pixel}$ . A multi-spin multi-echo (MSME) sequence, [schematized in Fig. 2](#), based on a succession of 16 echoes was used, with an echo time  $T_E = 7.4\text{ ms}$ , and a recycle delay  $T_R = 1.2\text{ s}$ . [To produce a two-dimensional image, the measured 16 echoes were added in order to improve the signal-to-noise ratio](#)  
 125 [without increasing the measurement time](#) (Zhou et al., 2019), thus preventing direct concentration quantification. Moreover, due to the short recycle delay used to keep measurement time below 4 min, the resulting signal depends simultaneously on

the spin-lattice relaxation time  $T_1$  and on the spin-spin relaxation time  $T_2$ , thus complicating quantification through a simple comparison with a reference. The MRI images can nevertheless be used to evaluate where  $Gd^{3+}$  is present within the column.

## 2.5 Computer simulations

130 Numerical simulations were performed with COMSOL Multiphysics (version 5.4), a commercial finite element software. COMSOL Multiphysics was used to define the geometry of the problem, to generate the computational mesh and to solve the partial differential equations governing the fluid flow and the non-reactive transport of the solute, with the specified initial and boundary conditions.

To simulate column B, we developed a 2D axisymmetric geometric model (15.0 cm length and 2.5 cm radius) with two regions: one for the sandy matrix and another one for the macropore. The filters were represented as  $10\ \mu\text{m}$  thick porous media. The geometry of the inlet and outlet reservoirs was also taken into account in the numerical model.

The mesh was automatically built by COMSOL Multiphysics. It was adapted to the geometry previously defined with an increase in node density at the interfaces between subdomains and in small subdomains (like the filters and the reservoirs). We checked that the numerical results remained unaffected when the mesh was refined.

140 The stationary flow of the carrier liquid within the column was described by the Stokes equations in the macropore (free region) and by the Brinkman equations in the surrounding porous medium (Guyon et al., 2015). The Stokes equations read:

$$\begin{cases} -\nabla(p - \rho g z) + \mu \Delta \mathbf{u} = 0 \\ \nabla \cdot \mathbf{u} = 0 \end{cases} \quad (2)$$

$p$  stands for the liquid pressure,  $\mu$  for the dynamic viscosity of the liquid,  $g$  for the gravitational acceleration,  $\rho$  for the liquid density,  $z$  for the vertical coordinate and  $\mathbf{u}$  for the velocity field of the liquid.

145 In the surrounding porous medium and in the filters, the Brinkman equations were used to model the liquid flow since momentum transport induced by shear stresses is of importance at the interface between the macropore and the porous matrix (Ochoa-Tapia and Whitaker, 1995). These equations extend Darcy's law to describe the dissipation of the kinetic energy by viscous shear and read:

$$\begin{cases} -\nabla p + \mu \phi^{-1} \Delta \mathbf{u} - \mu \kappa^{-1} \mathbf{u} = 0 \\ \nabla \cdot \mathbf{u} = 0 \end{cases} \quad (3)$$

150  $\phi$  is the porosity and  $\kappa$  the permeability of the porous matrix.

The non-reactive solute transport was modeled with by the advection-diffusion equation in the macropore and the advection-dispersion equation in the porous medium. Both equations can be written as:

$$\frac{\partial c}{\partial t} = \underline{\underline{\mathbf{D}}} \cdot \nabla^2 c - \mathbf{u} \cdot \nabla c. \quad (4)$$

In the macropore,  $\underline{\underline{\mathbf{D}}}$  denotes the isotropic tensor  $D_0 \underline{\underline{\mathbf{I}}}$ ,  $D_0$  being the molecular diffusion coefficient of the solute and  $\underline{\underline{\mathbf{I}}}$  the second-order identity tensor. In the porous matrix and in the filters,  $\underline{\underline{\mathbf{D}}}$  denotes the transversely isotropic tensor  $D_L \hat{\mathbf{u}} \otimes \hat{\mathbf{u}} +$



$D_T(\mathbf{I} - \hat{\mathbf{u}} \otimes \hat{\mathbf{u}})$ , where  $D_L$  is the longitudinal coefficient of dispersion,  $D_T$  the ~~transversal~~ **transverse** coefficient of dispersion and  $\hat{\mathbf{u}} \equiv \mathbf{u}/|\mathbf{u}|$  the normalized vector **parallel to the water flux**. The symbol  $\otimes$  denotes the tensor product. In the porous matrix,  $D_L$  and  $D_T$  combine the effects of both molecular diffusion and mechanical dispersion and can be written as follows (Bear, 1988):

$$160 \quad \begin{cases} D_L = \lambda_L |\mathbf{u}| + \tau D_0 \\ D_T = \lambda_T |\mathbf{u}| + \tau D_0 \end{cases} \quad (5)$$

$\tau$  is the tortuosity of the porous medium,  $\lambda_L$  the longitudinal dispersivity and  $\lambda_T$  the transverse dispersivity. Moreover, we assumed for the sake of simplicity that the transverse dispersivity was equal to one-tenth of the longitudinal dispersivity,  $\lambda_T = \frac{1}{10} \lambda_L$  (Zech et al., 2018).

Solving Eqs. 2, 3 and 4 requires the knowledge of the hydraulic and transport properties of the porous medium and the  
165 filters. Regarding hydraulic properties, the permeability of the sand was evaluated with the Kozeny-Carman equation (Guyon et al., 2015),

$$\kappa = \frac{\phi^3 d_g^2}{180 (1 - \phi)^2}, \quad (6)$$

$d_g$  being the mean diameter of the grains. In order to fit the experimental BTCs,  $d_g$  was taken equal to 0.57 mm (a value rather close to **the median pore diameter**  $d_{50} = 0.38$  mm determined by X-ray tomography), yielding for the sand a permeability of  
170  $2.6 \times 10^{-10} \text{ m}^2$ . The filter was modeled as a thin porous slab periodically perforated by square holes of length  $a = 10 \mu\text{m}$ . The surface porosity of the slab has been taken equal to  $\phi_{\text{filter}} = 25\%$ . According to Bruus (2007), **for a laminar flow**, the permeability of a channel with a square cross-section of side length  $a$  is equal to

$$\kappa_{\text{sq}} = \frac{a^2}{12} \left[ 1 - \frac{192}{\pi^5} \sum_{n=0}^{+\infty} \frac{1}{(2n+1)^5} \tanh \left( \left( n + \frac{1}{2} \right) \pi \right) \right]. \quad (7)$$

Numerically, this yields  $\kappa_{\text{sq}} \simeq 3.5 \times 10^{-2} a^2$ . The permeability of the filter was taken equal to  $\kappa_{\text{filter}} = 3.5 \times 10^{-2} a^2 \phi_{\text{filter}} =$   
175  $8.7 \times 10^{-13} \text{ m}^2$ . The **longitudinal** dispersivity of the porous matrix was taken equal to the ~~mean-pore-size~~ **median pore diameter**, i.e. ~~0.40 mm~~ **0.38 mm** for the sand,  $10 \mu\text{m}$  for the filters, and the tortuosity was set equal to 1 **for all porous domains of the system**.

As for the boundary conditions, a given flow rate was imposed at the inlet of the column and a uniform pressure was imposed at the outlet. For the solute, we considered a concentration flux condition at the entry of the system. To model the injection of a  
180 5 mL volume of tracer solution, we set the concentration flux to 1 during the first 5 mL of injected solution and ~~to~~ 0 afterwards. Since Eq. 4 is linear in  $c$ , the concentration calculated this way is equal to the normalized concentration, whatever the genuine value of the physical concentration of the tracer solution at the inlet of the column.

The flow field within the columns, the temporal evolution of solute concentration maps and numerical BTCs were then computed by solving numerically Eqs. 2, 3 and 4.

### 3.1 Breakthrough curves

The normalized concentrations measured at the outlet of the columns A, B and C, plotted as a function of the number of pore volumes (PV), are depicted in Fig. 3. For the experiments reported in the present section,  $\text{KNO}_3$  solutions have been used as conditioning and tracer solutions. We remind that PV is equal to  $Qt/V_0$ , where  $V_0$  denotes the pore volume of the column and  $t$  the elapsed time since the beginning of the injection of the tracer solution. We conducted three breakthrough experiments for each column, and the corresponding error bars are shown in Fig. 3.

The BTCs of the homogeneous column (column A) are displayed in Fig. 3a. They have been measured in the presence and in the absence of the outlet filter and are both slightly asymmetric bell-shaped curves, a standard shape for columns filled with homogeneous porous media. The two BTCs are nearly indistinguishable, which implies that the outlet filter has no impact on solute transport in the homogeneous case.

The results are very different for the two macroporous columns, B and C. The BTCs measured at the outlet of column B (perforated macropore) are depicted in Fig. 3b, in the presence (blue curve) and in the absence (red curve) of an outlet filter. The two BTCs share some features, such as the existence of two distinct peaks. The first peak is very asymmetric, with a short ascent followed by a long tail. Breakthrough starts for small values of the number of pore volumes ( $\text{PV} \leq 0.02$ ) and the maximum of the first peak is reached for  $\text{PV} \simeq 0.05$ . The second peak is much more symmetric and reaches its maximum after more than 3 pore volumes. However, the two BTCs differ with respect to the position of the maximum of the second peak: it is located at  $\text{PV} \simeq 3.2$  when the outlet filter is present and at  $\text{PV} \simeq 3.6$  without any outlet filter. This discrepancy entails that the mean residence time associated with the second peak is affected by the presence of the outlet filter. Besides, this mean residence time is directly related to the mean longitudinal pore velocity of the solute giving rise to the second peak of the BTCs. Consequently, the difference in PVs means that the flow within the column is affected by the presence of the outlet filter.

The analysis of the BTCs of column B gives further insight into the characteristics of the flow field within this column. The decrease of the first peak is surprisingly slow. The normalized concentration remains above zero at least up to  $\text{PV} = 1.5$ , whereas the volume of the macropore is only 1% of the total pore volume of the system. The slow decrease of the normalized concentration measured at the outlet of column B thus hints at the existence of a substantial solute transfer between the porous matrix and the macropore.

We performed the same kind of experiments by replacing the perforated hollow cylinder used in column B by with a plain one to investigate the possible occurrence of such a transfer. The BTCs measured at the outlet of column C are depicted in Fig. 3c, in the presence (blue curve) and in the absence (red curve) of the outlet filter. The shape of the BTCs is less affected by the presence of the outlet filter than for column B. The comparison of Fig. 3b and Fig. 3c shows that the decrease of the first peak is much more pronounced for column C. In this column, by construction, water and solute exchange is prohibited between the macropore and the porous matrix. Thus, the solute entering the column through the macropore (respectively, through the porous matrix) remains in the macropore (respectively, in the porous matrix) throughout its transport within the column. Accordingly, the mass balances corresponding to both peaks are directly related to the fractions of water flowing

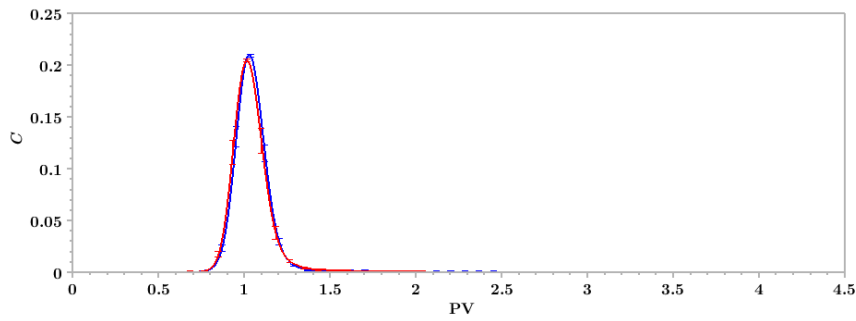

(a) Column A (homogeneous column)

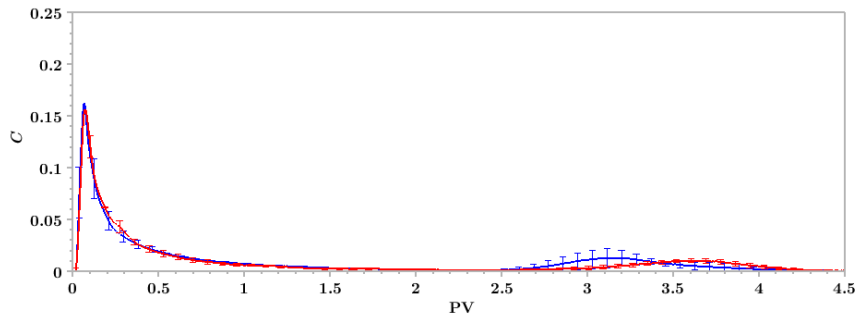

(b) Column B (heterogeneous column with a perforated macropore)

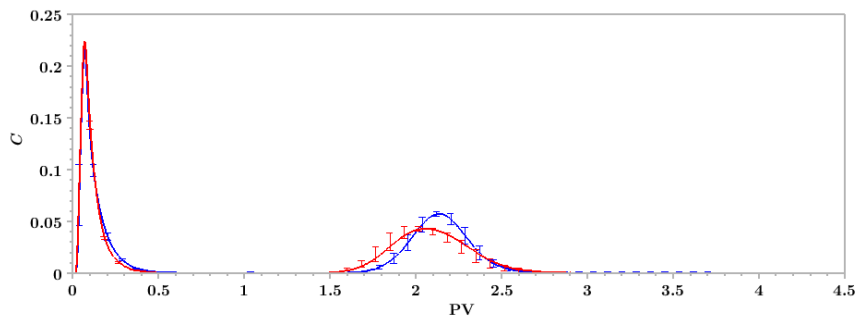

(c) Column C (heterogeneous column with a plain macropore)

**Figure 3.** Breakthrough curves, showing the normalized concentration  $C$  as a function of the number of pore volumes  $PV$ , measured at the outlet of columns A, B and C, in the presence (blue curve) and in the absence (red curve) of an outlet filter. Each breakthrough experiment has been conducted three times.

through the macropore and through the matrix. This is not the case for column B, whose macropore is perforated. Thus, it can experience some solute transfer between the macropore and the surrounding matrix. The difference between the BTCs of columns B and C shows that such solute transfer does occur and explains the long tail associated with the first peak measured at the outlet of column B. Moreover, in contrast with column B, the area below the first peak of column C is less than half of

the total area below the BTC, providing further information on the extent of solute transfer between the macropore and the porous matrix in column B.

225 Finally, for column C, the second peaks reach their maxima for rather similar values of PV ( $PV \simeq 2.1$  in the presence of the outlet filter and  $PV \simeq 2.0$  in its absence). These values are smaller than those observed for column B, which means that the mean longitudinal pore velocity of the solute associated with the second peak is significantly greater in column C than in column B. It shows that, besides the alteration of water and solute exchange at the interface between the macropore and the porous matrix, the presence of a plain macropore also modifies the flow field within the column.

### 230 3.2 MRI monitoring of $Gd^{3+}$ transport

A set of successive two-dimensional MRI images illustrating the time evolution of  $Gd^{3+}$  presence within column B is shown in Fig. 4b and 4c. These images were taken ~~over the course of~~ throughout the injection of the  $GdCl_3$  tracer solution. Due to magnetic field heterogeneity, the images are deformed near the entrance and the exit of the column, leading to the distortion of the column lateral boundary on the images. However, this imperfection does not hinder their qualitative exploitation. Moreover, 235 we also carried out additional breakthrough experiments, this time with  $GdCl_3$  conditioning and tracer solutions (see Fig. 4a). The general features of the  $GdCl_3$  BTCs are similar to those of the  $KNO_3$  BTCs (displayed in Fig. 3b), discussed in the previous section.

In the successive two-dimensional images displayed in Fig. 4b and 4c, the grey level of each pixel is sensitive to two parameters, the local porosity (since the column is saturated, the higher the local porosity, the higher the quantity of water in a given small volume and the higher the MRI signal) and the  $Gd^{3+}$  local concentration (the higher the concentration of  $Gd^{3+}$ , 240 the lower the MRI signal) (Haber-Pohlmeier et al., 2017). In the first image of Fig. 4b, before the beginning of the injection, the macropore, where the local porosity is equal to 1, appears in light grey, whereas the surrounding porous matrix, which local porosity  $\simeq 0.4$ , appears in medium grey. In the following images ( $PV_1 - PV_8$ ), some solute is present in the column and its local concentration is positively correlated with the pixel level of darkness.

245 The transport of  $Gd^{3+}$  within the porous matrix can easily be observed, both in the presence (Fig. 4b) and in the absence of the outlet filter (Fig. 4c). We start the discussion ~~by~~ with the case where the outlet filter is present (Fig. 4b). At  $PV_1$ , a dark cone appears just before the outlet filter. Meanwhile, a  $Gd^{3+}$  front appears in the porous matrix surrounding the macropore at the bottom of the column. Then, as can be seen at  $PV_2$ , the cone extends downwards and laterally towards the lateral boundary of the column. Moreover, the front visible in the porous matrix moves upwards. Subsequently, a brighter zone appears at the 250 center of the cone (at  $PV_3$ ), then invading the whole conical region, except along the boundaries of the cone which remain slightly dark (see  $PV_4$  image). Meanwhile, the  $Gd^{3+}$  front continues its ascent into the porous matrix. When the  $Gd^{3+}$  front approaches the column outlet and reaches the tip of the cone, it starts to distort (at  $PV_5$  and  $PV_6$ ) before disappearing (at  $PV_7$  and  $PV_8$ ). During this last stage, the front is made of two very distorted parts that move away from the macropore and the central part of the column.

255 In the absence of the outlet filter (Fig. 4c), the situation differs. The MRI images displayed in Fig. 4c show that, in the matrix, the elution front moves upwards with a nearly horizontal shape, except for a small distortion close to the lateral boundary of

the columns. This small deformation of the front is probably due to the existence of a slight preferential flow along the lateral boundary of the column (also visible when a filter is present, cf. Fig. 4b). Moreover, the horizontal shape of the front is altered when it approaches the exit of the column (see PV<sub>5</sub> – PV<sub>8</sub> images), but to a lesser extent than when the outlet filter is present. We can also notice that the macropore region appears **slightly slightly** darker at the beginning of the injection (PV<sub>1</sub> and PV<sub>2</sub> images): this change of color is likely related to the transfer of Gd<sup>3+</sup> in the macropore. Furthermore, in the absence of the outlet filter, no conical shape appears close to the outlet of the column.

Thus, the strong impact related to the presence of a filter at the outlet of column B, visible on the BTCs and already discussed in the previous section, is also clearly visible in the MRI experiments. When such a filter is present, the time evolution of the solute concentration map within the column is rather complex and displays some marked two-dimensional features. The computer simulations presented in the following section will be helpful to gain a better understanding of the flow processes and their impact on non-reactive solute transport occurring in column B, both in the presence and in the absence of the outlet filter.

### 3.3 Finite element computations

We solved numerically Eqs. 2, 3 and 4 in a two-dimensional axisymmetric domain representing column B, with and without an outlet filter. The modeled BTCs (Fig. 5a) and resident normalized concentration (Figs. 5b and 5c) are in good agreement with the experimental data presented in Fig. 4. Moreover, the most eye-catching feature related to the influence of the outlet filter on the experimental BTCs, which is its influence on the **second peak position**, is well reproduced by the numerical BTCs displayed in Fig. 5a. As in the breakthrough experiments (see Fig. 3b), the second peak shifts leftwards, its maximal value increases and its width decreases when the outlet filter is added. On the downside, the modeling of the first peak appears to be challenging and we **did not succeed in reproducing failed to reproduce** quantitatively this portion of the experimental BTCs. Small geometrical details close to the entrance of the column have a sizable effect on the first peak of the numerical BTCs and make it difficult to go beyond the qualitative agreement that we nevertheless highlighted.

The numerical concentration maps are in good qualitative agreement with the MRI images. In the presence of the outlet filter (see Fig. 5b), a conical shape rich in solute appears right after the beginning of the injection close to the exit of the column, as observed in the MRI experiments (cf. Fig. 4b). In addition, the model predicts the progressive fading of this conical shape with the temporary persistence of a solute-rich region along its boundaries (see PV<sub>3</sub> image of Fig. 5b). It also reproduces the upwards transport of the solute front within the porous matrix: the front in the porous matrix is nearly horizontal during the initial stage of the transport (images PV<sub>1</sub> – PV<sub>4</sub> of Fig. 5b), before being strongly distorted while approaching the exit of the column (images PV<sub>5</sub> – PV<sub>8</sub> of Fig. 5b), in good qualitative agreement with the images acquired by MRI (cf. Fig. 4b).

The numerically computed concentration maps change significantly when the outlet filter is removed, but the agreement between the calculated maps and the MRI images is still good. In the absence of the outlet filter, the solute remains much more located into the macropore at the beginning of the injection, with only a slight diffusion in its surroundings (see images PV<sub>1</sub> – PV<sub>3</sub> of Fig. 5c). Moreover, no conical region appears in the vicinity of the exit of the column. Afterwards, the model predicts the upwards movement of the solute front within the porous matrix, without any distortion and with a progressive exit through

the column outlet (images  $PV_4 - PV_8$  of Fig. 5c). This pattern is similar to that observed by MRI (Fig. 4c). The sole perceptible difference is that after  $PV_4$ , the front is curved upward in Fig. 4c, whereas it remains almost flat in the computer simulations. We believe that this may be due to the existence of a small preferential flow along the lateral boundary of the experimental column.

295 The good overall agreement between the numerical results and the observed data allows us to conclude on ~~the way how~~ the solute is ~~transferred~~ transferred through column B and to explain the effect of the outlet filter. Without the outlet filter, the solute enters into the macropore and the matrix and is then transported through these subdomains with a very moderate solute exchange between ~~these subdomains~~ them. Only a slight solute spread is visible in the upper part of the macropore (images  $PV_1 - PV_3$  of Fig. 5c). Solute concentration maps are similar in the lower half of the column, whatever the presence of an  
300 outlet filter, but drastic changes occur in the upper half of the column depending on the presence of such a filter. The outlet filter triggers a significant solute exchange between the macropore and the matrix, resulting in the appearance of a conical region rich in solute (images  $PV_1 - PV_3$  of Fig. 5b). Meanwhile, a fraction of the solute is transported through the matrix, and the corresponding front remains nearly horizontal until ~~its~~ gets sufficiently close to the column outlet. Then, this front experiences a distortion and moves towards the column lateral boundary.

305 To summarize, the outlet filter routes a fraction of the solute transiting through the macropore to the matrix before the exit of the column. The presence of the filter also implies that the solute transported through the matrix avoid the macropore and the central part of the column when approaching the column outlet.

The effect of the outlet filter on solute transport results from its effect on the flow. We analyzed the water flow field to better understand how the presence of the outlet filter modifies the flow and thus impacts solute transport. Various features of the  
310 flow field are depicted in Fig. 6. From the analysis of the streamlines (Figs. 6a and 6d), the velocity magnitude maps (Figs. 6b and 6e), and the radial component of the velocity field at the interface between the macropore and the matrix (Figs. 6c and 6f), it is clear that the flow fields, with and without the outlet filter, are similar in the lower half of the column and strongly differ in the upper half. The outlet filter triggers a divergence of streamlines from the macropore to the matrix close to the column outlet (Fig. 6a) and thus a water flux along this direction, as revealed by the positive radial component of the velocity  
315 vector at the macropore/matrix interface in the upper half of the column (Fig. 6c). This divergence and the related water flux across the macropore/matrix interface are responsible for the main features visible both in the MRI images (Fig. 4b) and the numerical solute concentration maps (Fig. 5b). Indeed, water routes the solute from the macropore to the surrounding matrix by advection. This flow pattern explains the conical shape associated to solute transport through the macropore (images  $PV_1 - PV_3$  of Fig. 5b). The same divergence routes the solute transported through the matrix far away from the center of the  
320 column and thus closer to the column lateral boundary. It explains the strong distortion experienced by the matrix front when it approaches the exit of the column (images  $PV_4 - PV_8$  of Fig. 5b). In the absence of the outlet filter, there is no longer any streamline divergence near the exit of the column exit (Fig. 6d), as the water flux at the macropore/matrix interface vanishes in the upper half of the column (Fig. 6f), yielding the solute to remain in either the matrix or the macropore (images  $PV_1 - PV_8$  of Fig. 5c), except for the possible occurrence of transport by molecular diffusion (Batany et al., 2019).

325 With its very low permeability, the outlet filter acts as a thin layer impeding flow. The effects of embedded layers in **macro-**  
**porous** media were already discussed by many authors. For instance, Lassabatere et al. (2004) and Lamy et al. (2013) showed  
that the amendment of geotextiles in soil columns is an efficient way to homogenize flow and then foster pollutant removal by  
the matrix. These authors hypothesized that the geotextiles acted as impeding layers and redistributed flow from high perme-  
ability conducting zones to lower permeability matrix zones. Even if, in our study, the filter was positioned at the end of the  
330 column, the same kind of behavior seems to occur. The low permeability of the filter act as a barrier to the preferential flow in  
the macropore and routes parts of the water and the solutes to the matrix.

The analysis of the flow field shows that the same homogenizing effect also occurs at the inlet. Indeed, in the presence of  
the outlet filter, symmetrical streamline distortion and flow field were obtained at the inlet and **at** the outlet of the column.  
Figure 6a shows the convergence to the macropore of some streamlines having entered the column through the porous matrix  
335 after the inlet filter, and the divergence to the porous matrix of some streamlines coming from the macropore before the outlet  
filter, an effect already observed in other MRI studies (Deurer et al., 2004; Greiner et al., 1997). The presence of the inlet filter  
tends to homogenize the magnitude of the fluid velocity right after the filter. Farther from the inlet filter, when its influence on  
the flow is no longer felt, the streamlines become almost parallel to the axis of the column: because of the symmetry of the  
streamlines in the presence of the outlet filter, this is only visible in the middle of the column in this case (see Fig. 6a), whereas  
340 it is apparent in the upper half of the column in the absence of any outlet filter (see Fig. 6d). In the region where streamlines  
are straight and parallel to each other, the flow is fully developed and the velocity field is similar to the one **that** one would  
get in the entire column if the water flow was unidirectional and pressure-driven. In the vicinity of the inlet filter, where the  
flow is not yet fully developed, the carrier liquid velocity increases within the macropore as one goes from the bottom to the  
middle of the column and simultaneously decreases in the porous matrix because of the incompressibility of the liquid flow  
345 (see for instance Fig. 6e). However, despite the symmetry of the streamlines between the inlet and the outlet of the column  
when filters are present at both extremities, **qualitatively**, solute transport seems to be rather unaffected by the presence of an  
inlet filter. **In contrast**, it is strongly impacted by the presence of the outlet filter. **Images** acquired by MRI (Figs. 4b and 4c)  
and computer simulations (Figs. 5b and 5c) show that the solute front is nearly horizontal in the lower half of a **macroporous**  
column containing a perforated macropore. The presence of the inlet filter probably alters the mass **repartition** **partition** between  
350 the macropore and the surrounding matrix, but it does not give rise to a distortion of the solute front like the one generated by  
the diverging flow pattern induced by the presence of the outlet filter.

#### 4 Conclusions

In this study, we investigated the effect of an outlet filter on solute elution and on the time evolution of concentration maps in  
homogeneous and **macroporous** columns, considering both perforated (i.e. permeable) and plain (i.e. impermeable) macrop-  
355 ores. For this purpose, we combined i) column breakthrough experiments with tracer solutions ( $\text{KNO}_3$  and  $\text{GdCl}_3$ ); ii) MRI  
experiments to monitor  $\text{Gd}^{3+}$  transport within columns and iii) computer simulations of water flow and non-reactive solute  
transport.

While the breakthrough curve is unaffected by the presence of an outlet filter when the column is homogeneous, this is no longer true for **macroporous** columns, especially when the macropore is permeable to water and solute fluxes. Computer simulations show that this effect on flow and solute transport results from the barrier effect played by the outlet filter: the closer the macropore to the outlet filter, the smaller the velocity of the carrier liquid in the macropore, which leads to a strong divergence of the streamlines of the carrier liquid near the outlet filter. This entails a substantial transfer of water and a joint transport of solute of advective origin from the macropore to the surrounding matrix. Meanwhile, the solute conveyed through the porous matrix is transported away from the central part of the column when approaching the outlet filter. This very significant alteration of the flow before the outlet filter, which is responsible for some distinctive features of non-reactive solute transport within such columns, is obvious on the MRI images and the simulated concentration maps (occurrence of conical shapes) and explains the influence exerted by the outlet filter on the breakthrough curves.

The numerical results show that the presence of filters (at the outlet, but also at the inlet) can impact the flow of the carrier liquid over a significant part of the column. The flow can display some substantial non-unidirectional features associated with entrance/exit effects. Such finite length effects are expected to be less pronounced as the ratio between the length of the column and its diameter increases, but increasing this ratio is not always an option (e.g. because it entails the use of a greater amount of material and of stock solutions, or because the columns may have to be small due to experimental constraints).

~~This study shows that a~~ A simple one-dimensional transport model will not necessarily be appropriate, even when  $L/d_{col} = 3$  (ratio we have worked with in this study). Indeed, when it comes to fitting **accurately** the experimental data, **a** good knowledge is required regarding i) the stationary flow within the system; ii) the effect of the various elements of the experimental apparatus on solute transfer between domains differing in their hydraulic properties. ~~Our results shows that this knowledge is crucial for the understanding of the outcome of transport experiments in heterogeneous columns and for the accurate inference of transport properties from breakthrough studies. As emphasized in this work, for~~ For different experiments to be reliably exploited and compared, there is a need to report **accurately** the geometric features of the column and the boundary devices employed when performing transport experiments with heterogeneous media (frits or filters, reservoirs, incoming tubes, etc.). It ~~may~~ **might** only be possible to relate transport parameters to porous medium properties by taking into account the whole experimental apparatus employed. This issue requires **a** careful consideration of the potential impact of the geometry of the column and the additional boundary devices to draw **with a one-dimensional transport model** some quantitative estimates from experimental data obtained with **macroporous** columns **where water flow can display some non-unidirectional features**. In any case, more in-depth studies devoted to this subject are certainly called for.

*Author contributions.* JR: conducted the breakthrough experiments, contributed to the acquisition of MRI data and to the numerical modeling, and wrote the manuscript; PEP: contributed to design the research and wrote the manuscript; DCM: contributed to the acquisition of MRI data and to design the research, and edited the manuscript; TB: carried out the preliminary computer simulations; JGR: performed the MRI experiments; BB: designed the research and edited the manuscript; LL: designed the research and wrote the manuscript.



390 *Competing interests.* No competing interest to declare.

*Acknowledgements.* This work was performed within the INFILTRON project supported by the French National Research Agency (ANR-17-CE04-010). We thank Pascal Moucheront and Benjamin Maillat for MRI assistance, David Hautemayou for 3D printing, and Martin Guillon and Nadège Caubrière for technical assistance with the experimental columns.

## References

- 395 Allaire, S. E., Roulier, S., and Cessna, A. J.: Quantifying preferential flow in soils: A review of different techniques, *Journal of Hydrology*, 378, 179–204, 2009.
- Banzhaf, S. and Hebig, K. H.: Use of column experiments to investigate the fate of organic micropollutants-a review., *Hydrology & Earth System Sciences*, 20, 2016.
- Barry, D.: Effect of nonuniform boundary conditions on steady flow in saturated homogeneous cylindrical soil columns, *Advances in Water Resources*, 32, 522–531, 2009.
- 400 Batany, S., Peyneau, P.-E., Lassabatère, L., Béchet, B., Faure, P., and Dangla, P.: Interplay between Molecular Diffusion and Advection during Solute Transport in Macroporous Media, *Vadose Zone Journal*, 18, 1–15, 2019.
- Baur, J. E., Kristensen, E. W., and Wightman, R. M.: Radial dispersion from commercial high-performance liquid chromatography columns investigated with microvoltammetric electrodes, *Analytical Chemistry*, 60, 2334–2338, 1988.
- 405 Bear, J.: *Dynamics of fluids in porous media.*, Dover Publications, 1988.
- Beven, K. and Germann, P.: Macropores and water flow in soils revisited, *Water Resources Research*, 49, 3071–3092, 2013.
- Bromly, M., Hinz, C., and Aylmore, L.: Relation of dispersivity to properties of homogeneous saturated repacked soil columns, *European Journal of Soil Science*, 58, 293–301, 2007.
- Broyles, B. S., Shalliker, R. A., and Guiochon, G.: Visualization of sample introduction in liquid chromatography columns: the effect of the frit diameter, *Journal of Chromatography A*, 855, 367–382, 1999.
- 410 Bruus, H.: *Theoretical Microfluidics*, Oxford University Press, 2007.
- Cortis, A. and Berkowitz, B.: Anomalous transport in “classical” soil and sand columns, *Soil Science Society of America Journal*, 68, 1539–1548, 2004.
- De Matos, A., Fontes, M., Da Costa, L., and Martinez, M.: Mobility of heavy metals as related to soil chemical and mineralogical characteristics of Brazilian soils, *Environmental Pollution*, 111, 429–435, 2001.
- 415 De Smedt, F. and Wierenga, P.: Solute transfer through columns of glass beads, *Water Resources Research*, 20, 225–232, 1984.
- Deurer, M., Vogeler, I., Clothier, B., and Scotter, D.: Magnetic resonance imaging of hydrodynamic dispersion in a saturated porous medium, *Transport in Porous Media*, 54, 145–166, 2004.
- Farkas, T., Chambers, J. Q., and Guiochon, G.: Column efficiency and radial homogeneity in liquid chromatography, *Journal of Chromatography A*, 679, 231–245, 1994.
- 420 Farkas, T., Sepaniak, M. J., and Guiochon, G.: Radial distribution of the flow velocity, efficiency and concentration in a wide HPLC column, *AIChE Journal*, 43, 1964–1974, 1997.
- Ghodrati, M., Chendorain, M., and Chang, Y. J.: Characterization of macropore flow mechanisms in soil by means of a split macropore column, *Soil Science Society of America Journal*, 63, 1093–1101, 1999.
- 425 Giddings, J.: *Dynamics of chromatography: Principles and theory*, CRC Press, 2002.
- Greiner, A., Schreiber, W., Brix, G., and Kinzelbach, W.: Magnetic resonance imaging of paramagnetic tracers in porous media: Quantification of flow and transport parameters, *Water Resources Research*, 33, 1461–1473, 1997.
- Gritti, F. and Gilar, M.: Impact of frit dispersion on gradient performance in high-throughput liquid chromatography, *Journal of Chromatography A*, 1591, 110–119, 2019.

- 430 Guiochon, G.: The limits of the separation power of unidimensional column liquid chromatography, *Journal of Chromatography A*, 1126, 6–49, 2006.
- Guyon, E., Hulin, J.-P., Petit, L., and Mitescu, C. D.: *Physical hydrodynamics*, Oxford University Press, 2015.
- Haber-Pohlmeier, S., Vanderborght, J., and Pohlmeier, A.: Quantitative mapping of solute accumulation in a soil-root system by magnetic resonance imaging, *Water Resources Research*, 53, 7469–7480, 2017.
- 435 James, R. and Rubin, J.: Accounting for apparatus-induced dispersion in analyses of miscible displacement experiments, *Water Resources Research*, 8, 717–721, 1972.
- Jin, Y., Chu, Y., and Li, Y.: Virus removal and transport in saturated and unsaturated sand columns, *Journal of Contaminant Hydrology*, 43, 111–128, 2000.
- Lamy, E., Lassabatere, L., Bechet, B., and Andrieu, H.: Modeling the influence of an artificial macropore in sandy columns on flow and  
440 solute transfer, *Journal of Hydrology*, 376, 392–402, 2009.
- Lamy, E., Lassabatere, L., Bechet, B., and Andrieu, H.: Effect of a nonwoven geotextile on solute and colloid transport in porous media under both saturated and unsaturated conditions, *Geotextiles and Geomembranes*, 36, 55–65, 2013.
- Lassabatere, L., Winiarski, T., and Galvez-Cloutier, R.: Retention of three heavy metals (Zn, Pb, and Cd) in a calcareous soil controlled by the modification of flow with geotextiles, *Environmental Science and Technology*, 38, 4215–4221, 2004.
- 445 Lehoux, A. P., Rodts, S., Faure, P., Michel, E., Courtier-Murias, D., and Coussot, P.: Magnetic resonance imaging measurements evidence weak dispersion in homogeneous porous media, *Physical Review E*, 94, 053 107, 2016.
- Li, Y. and Ghodrati, M.: Preferential transport of solute through soil columns containing constructed macropores, *Soil Science Society of America Journal*, 61, 1308–1317, 1997.
- Nielsen, D. R. and Biggar, J. W.: Miscible displacement in soils: I. Experimental information, *Soil Science Society of America Journal*, 25,  
450 1–5, 1961.
- Ochoa-Tapia, J. A. and Whitaker, S.: Momentum transfer at the boundary between a porous medium and a homogeneous fluid — I. Theoretical development, *International Journal of Heat and Mass Transfer*, 38, 2635–2646, 1995.
- Pang, L., Close, M., Schneider, D., and Stanton, G.: Effect of pore-water velocity on chemical nonequilibrium transport of Cd, Zn, and Pb in alluvial gravel columns, *Journal of Contaminant Hydrology*, 57, 241–258, 2002.
- 455 Pyykkö, P.: Magically magnetic gadolinium, *Nature Chemistry*, 7, 680–680, 2015.
- Schwartz, R., McInnes, K., Juo, A., Wilding, L., and Reddell, D.: Boundary effects on solute transport in finite soil columns, *Water Resources Research*, 35, 671–681, 1999.
- Shalliker, R. A., Broyles, B. S., and Guiochon, G.: On-column visualization of sample migration in liquid chromatography, *Analytical Chemistry*, 72, 323–332, 2000.
- 460 Starr, J. and Parlange, J.-Y.: Plate-induced Tailing in Miscible Displacement Experiments, *Soil Science*, 124, 56–60, 1977.
- Zech, A., Attinger, S., Bellin, A., Cvetkovic, V., Dietrich, P., Fiori, A., Teutsch, G., and Dagan, G.: A Critical Analysis of Transverse Dispersivity Field Data, *Groundwater*, 57, 632–639, 2018.
- Zhou, M., Caré, S., King, A., Courtier-Murias, D., Rodts, S., Gerber, G., Aïmedieu, P., Bonnet, M., Bornert, M., and Coussot, P.: Wetting enhanced by water adsorption in hygroscopic plantlike materials, *Physical Review Research*, 1, 033 190, 2019.

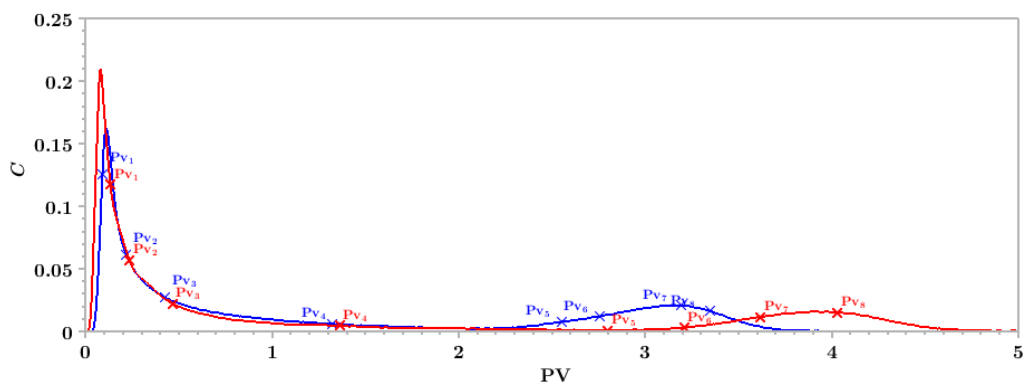

(a)

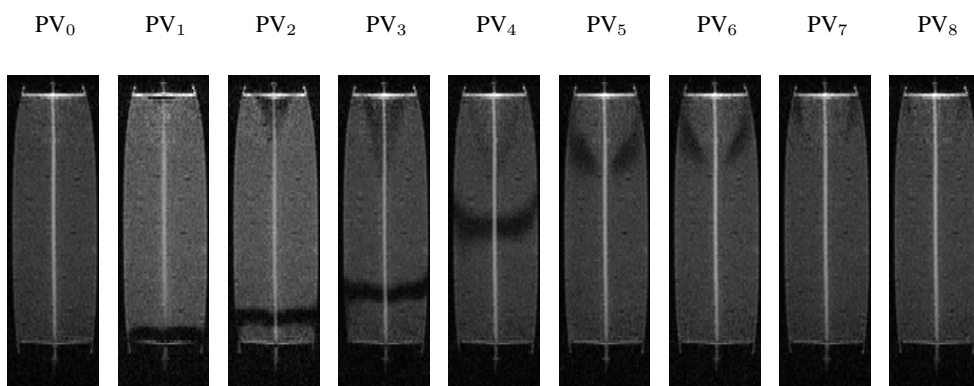

(b)

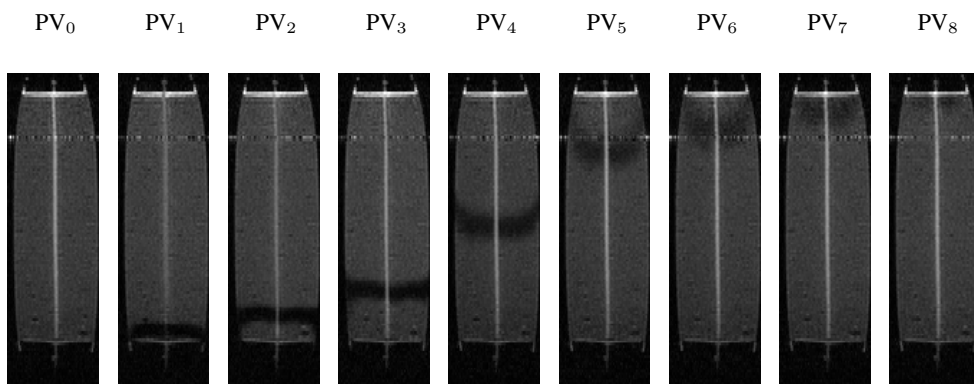

(c)

**Figure 4.** (a)  $\text{GdCl}_3$  experimental BTCs measured at the outlet of column B with (blue curve) and without (red curve) an outlet filter. MRI images taken during the course of throughout the elution as a function of the number of pore volumes PV for column B, with the outlet filter (b) and without the outlet filter (c). Pores volumes corresponding to the time average at which each image has been acquired are reported in (a). The  $\text{GdCl}_3$  tracer solution was injected at the bottom of the column.

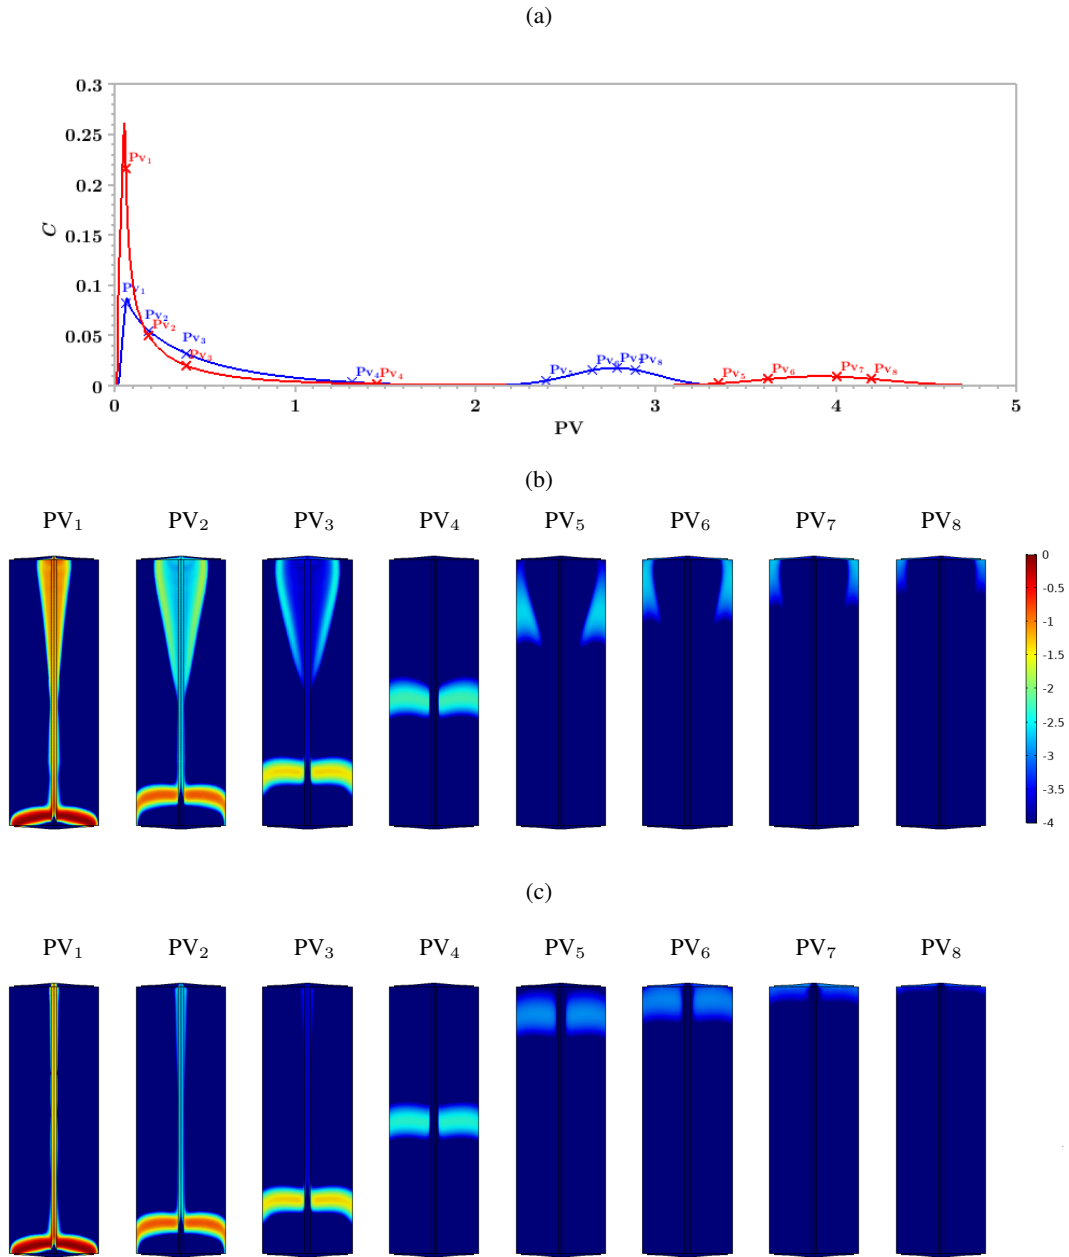

**Figure 5.** (a) Numerical BTCs calculated for a column with a permeable macropore in the presence (blue curve) and in the absence (red curve) of an outlet filter. Solute normalized concentration maps calculated over the course of throughout the elution of the solute, in the presence of with the outlet filter (b) and without the outlet filter (c). The scale of the colorbar is logarithmic. The number of pore volumes PV at which the maps have been computed are reported in (a). The solute is transported from the bottom to the top of the domain.

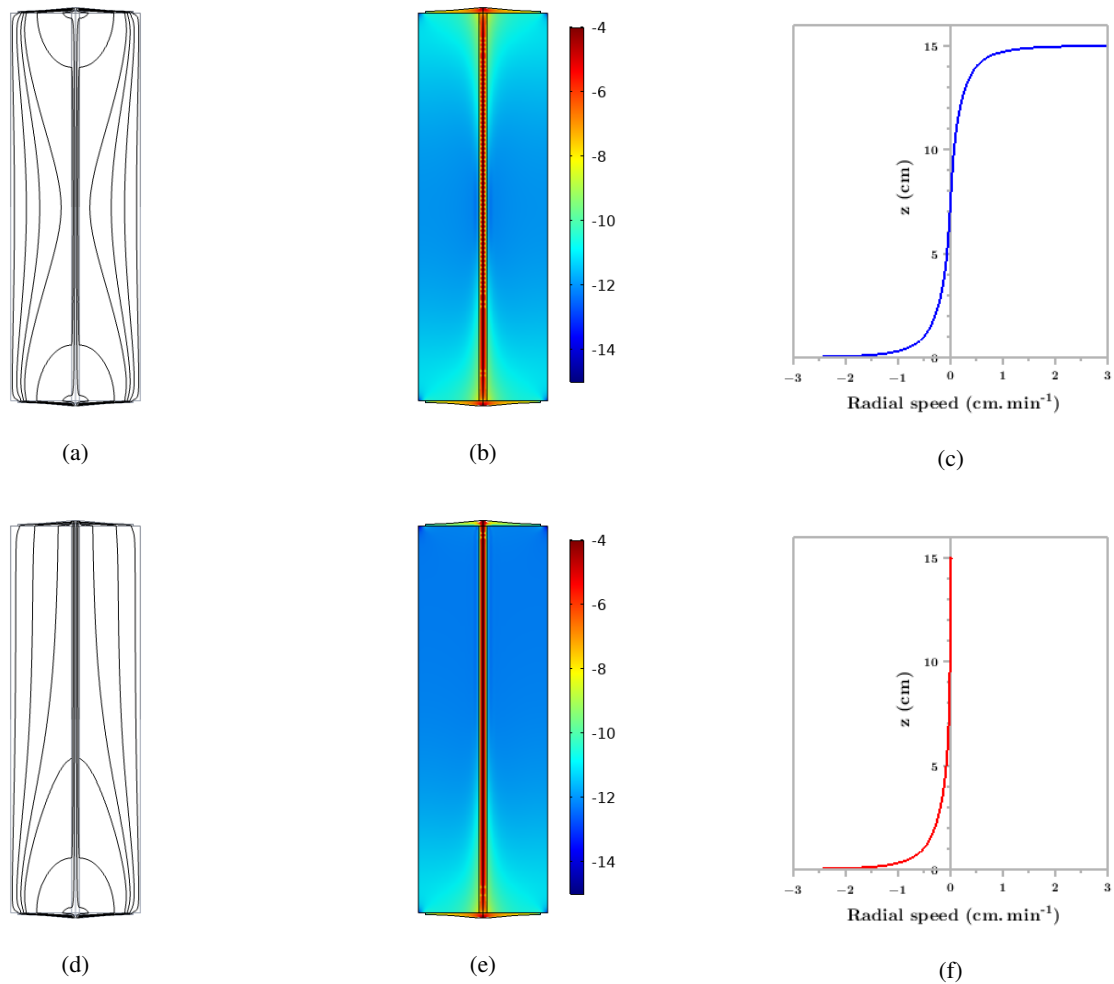

**Figure 6.** Various features of the flow field within a **macroporous** column with a permeable macropore in the presence (first row) and **in** the absence (second row) of an outlet filter. (a) and (d): velocity field streamlines. (b) and (e): logarithmic map of the velocity magnitude of the carrier liquid expressed in  $\text{m s}^{-1}$ . (c) and (f): radial component of the velocity vector on the matrix/macropore interface ( $> 0$  when water flows from the matrix to the macropore and  $< 0$  otherwise). The carrier liquid flows from the bottom to the top of the domain.
